# Supplementary material for: Systematic review: pain, cognition, and cardioprotection—unpacking oxytocin’s contributions in a sport context
Source: Frontiers journal article supplement (doi:10.3389/fphys.2024.1393497), 2024-06-10

Years by Articles

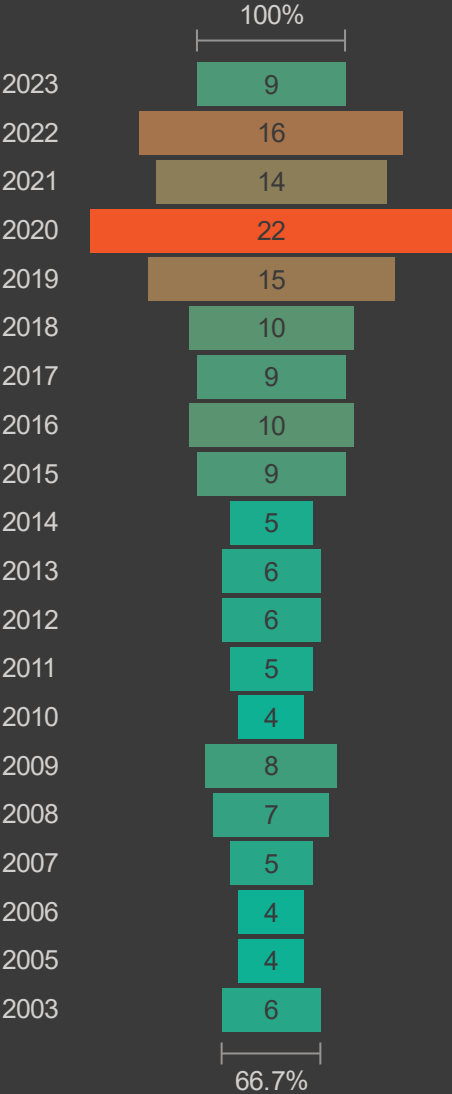

# Count of Articles by Factors

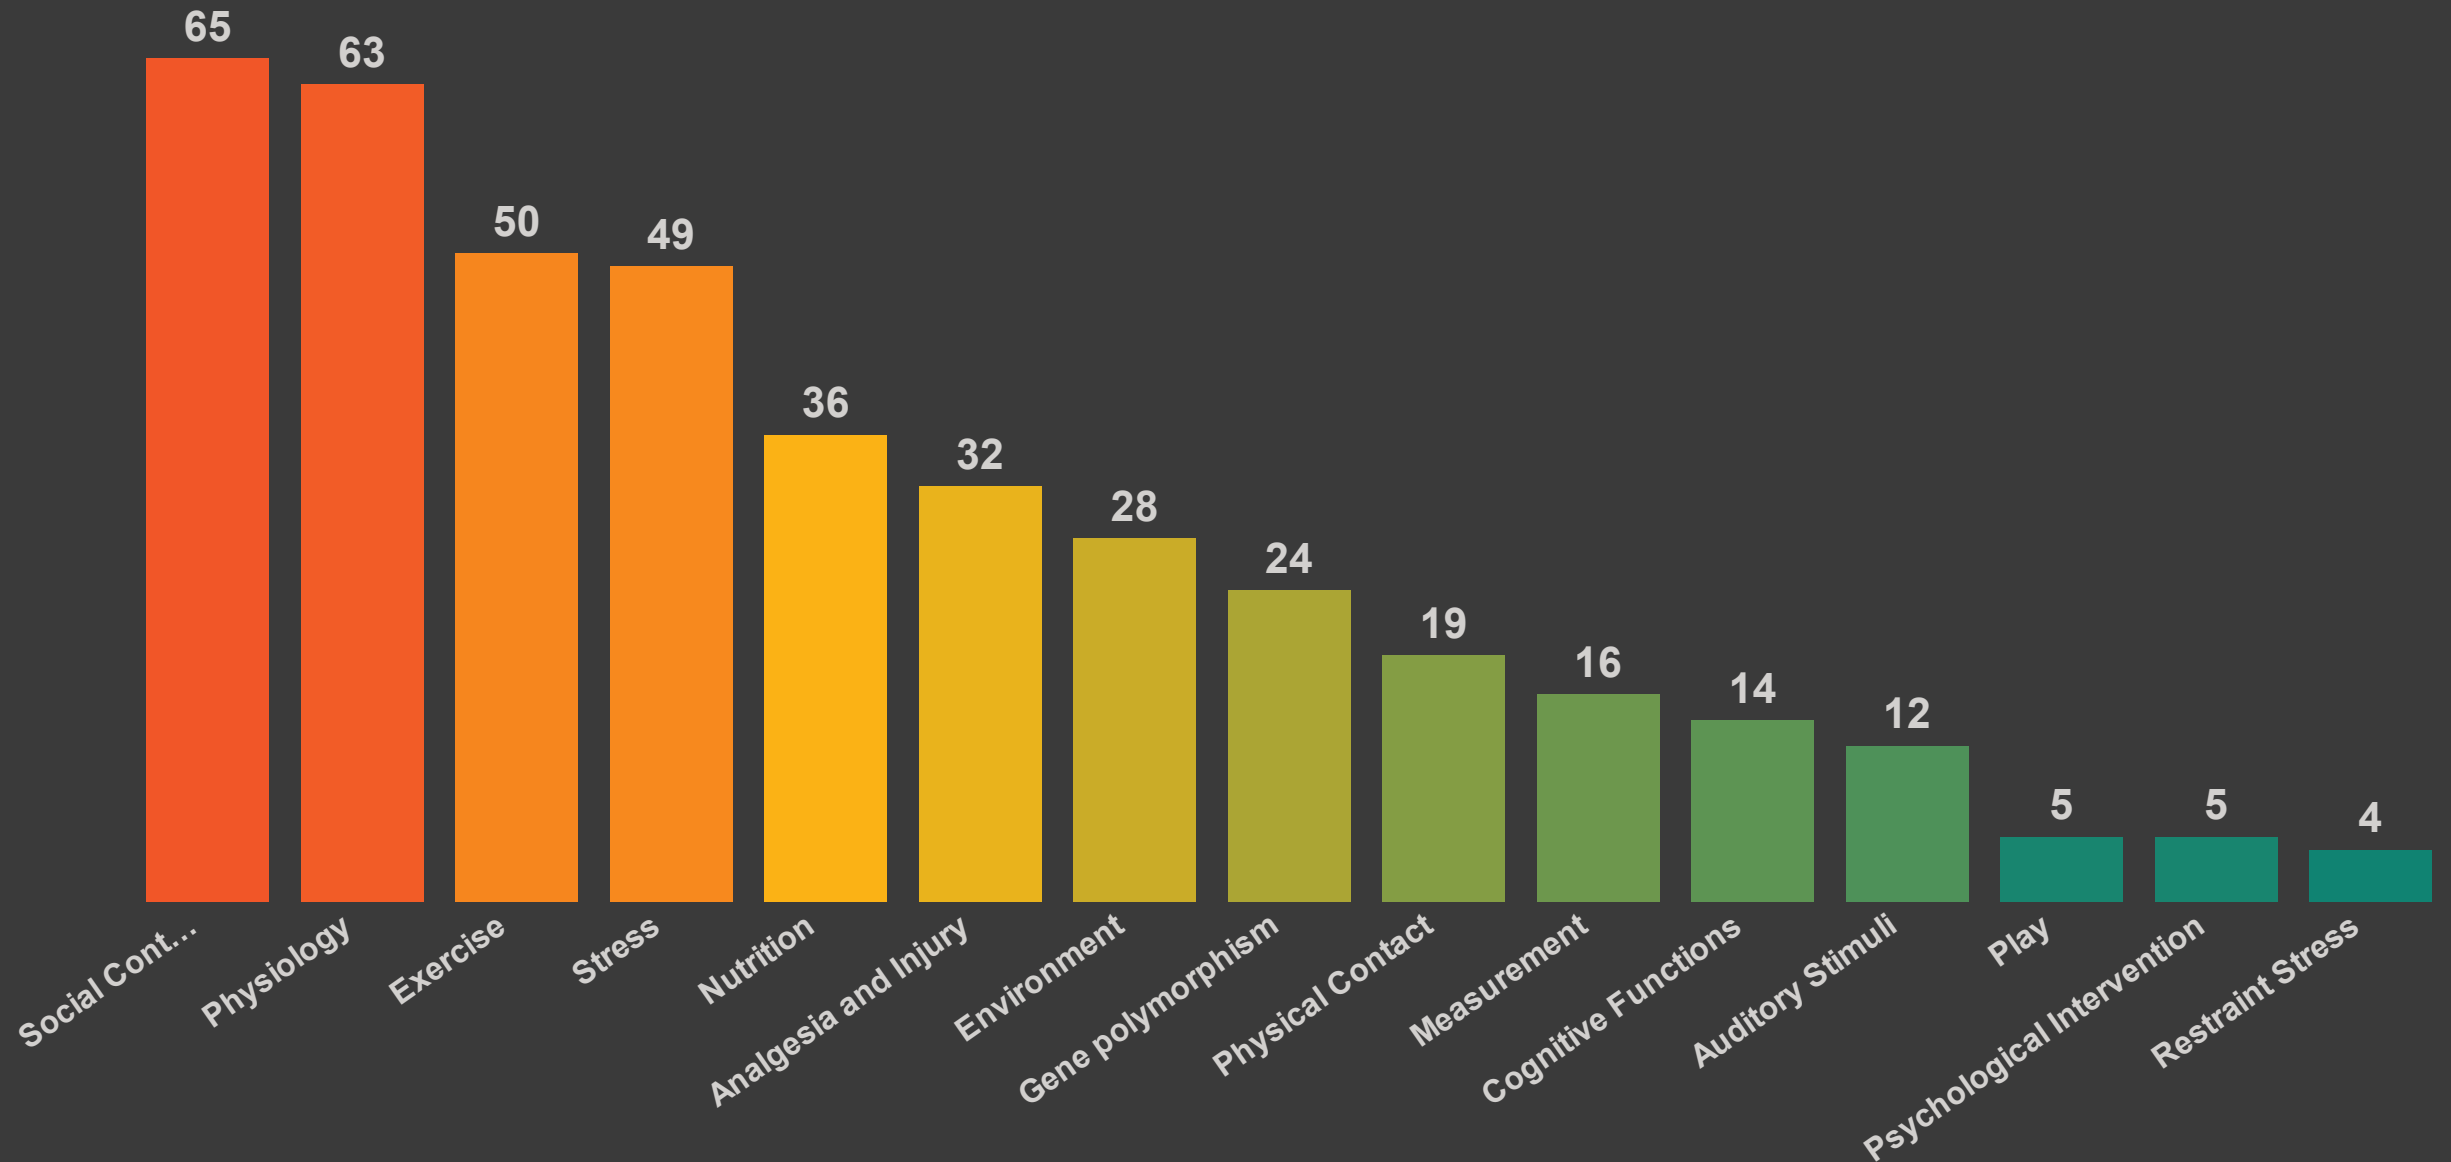

# Exercise Type

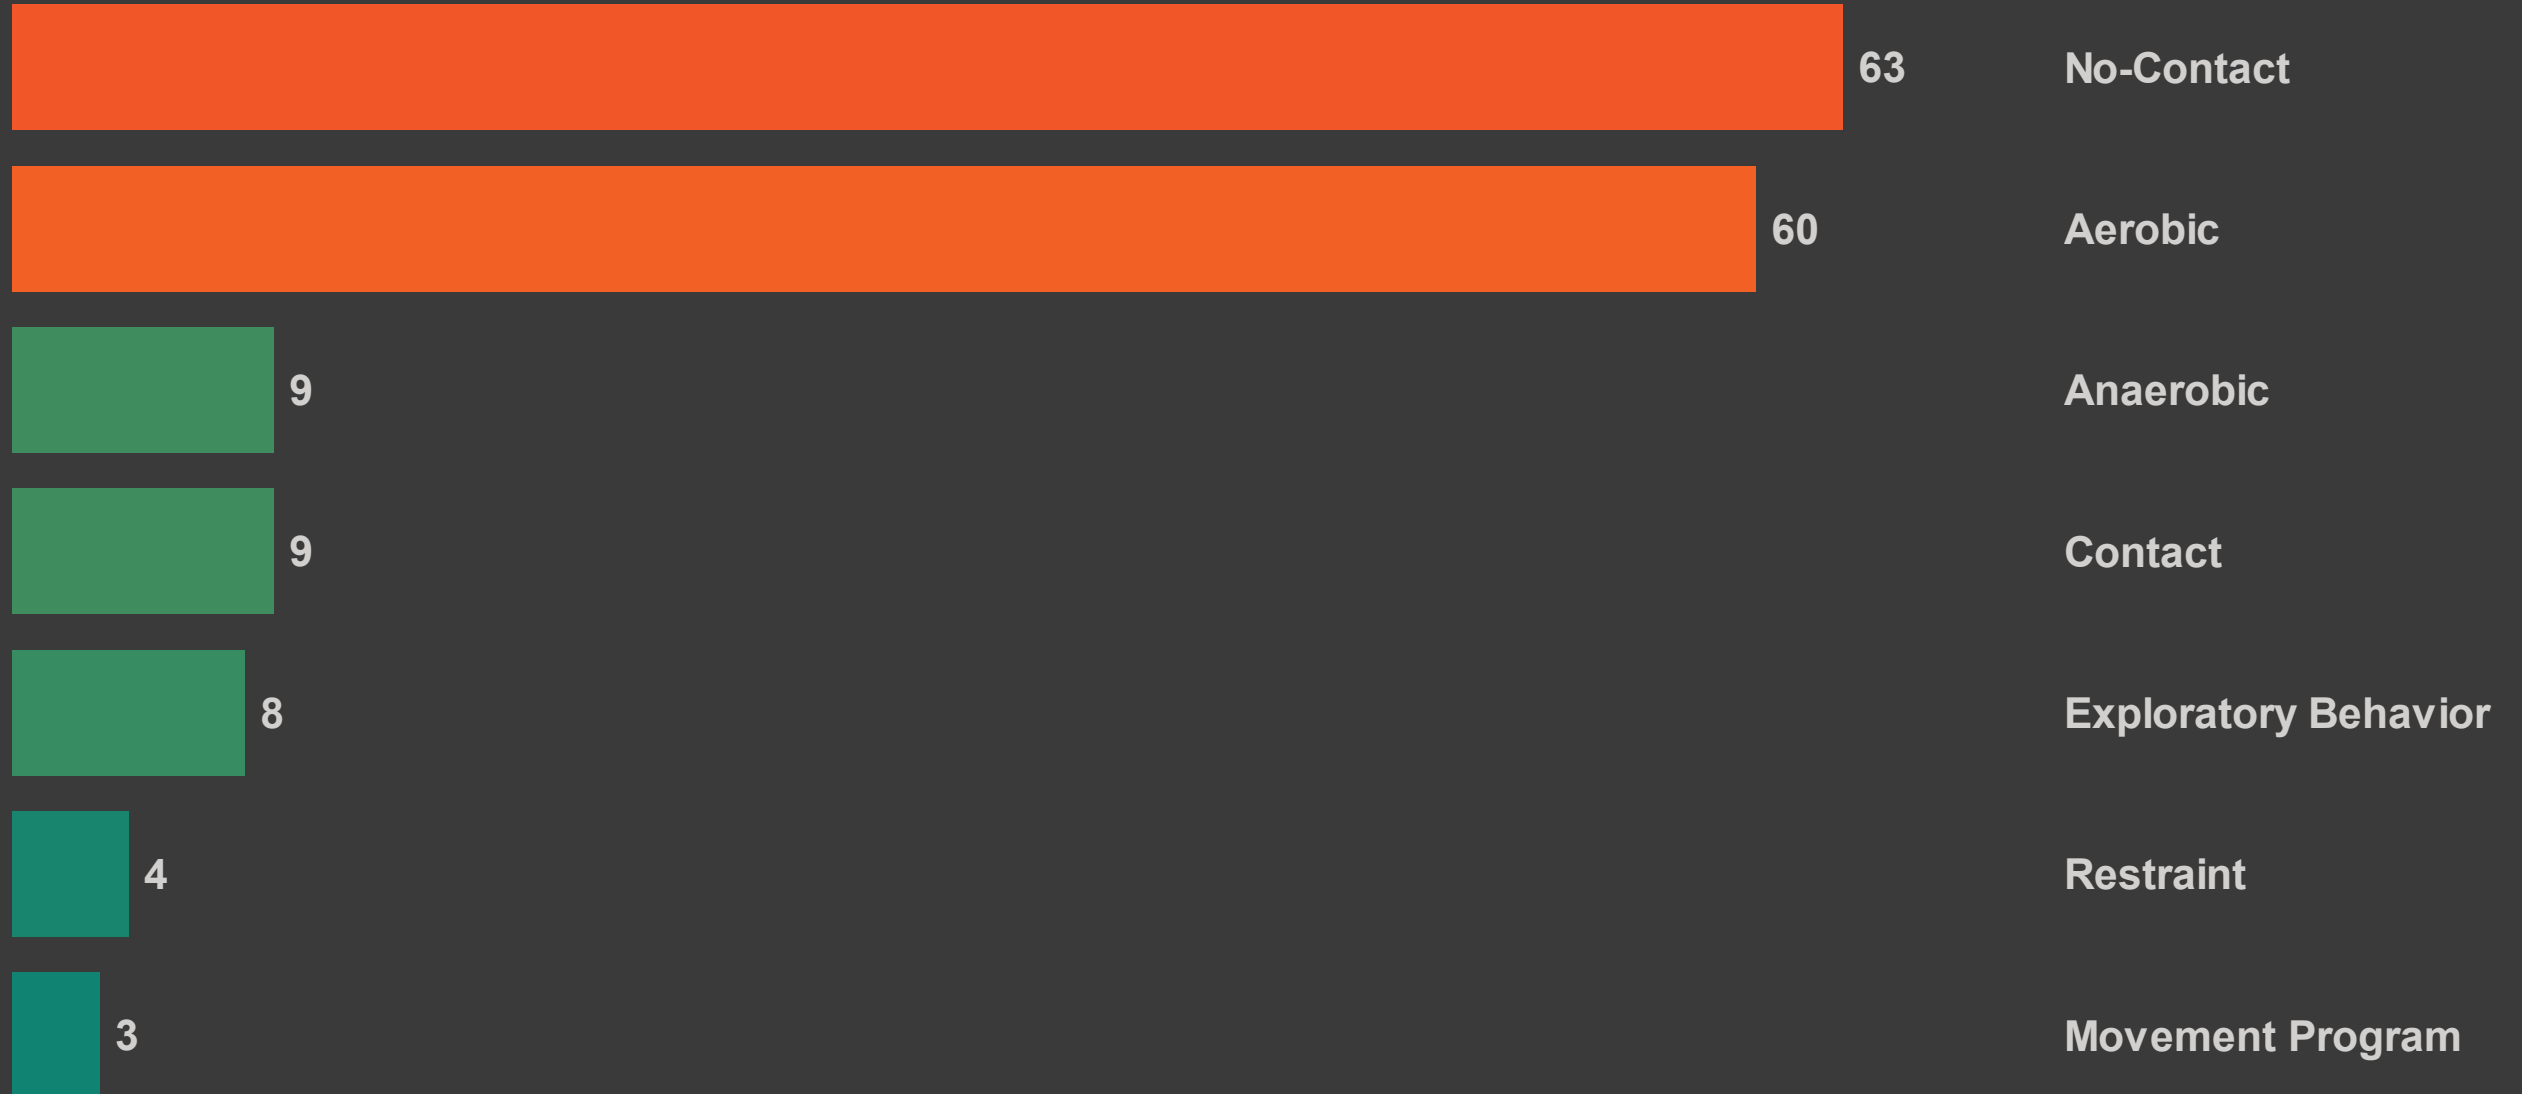

# Physiological measurements

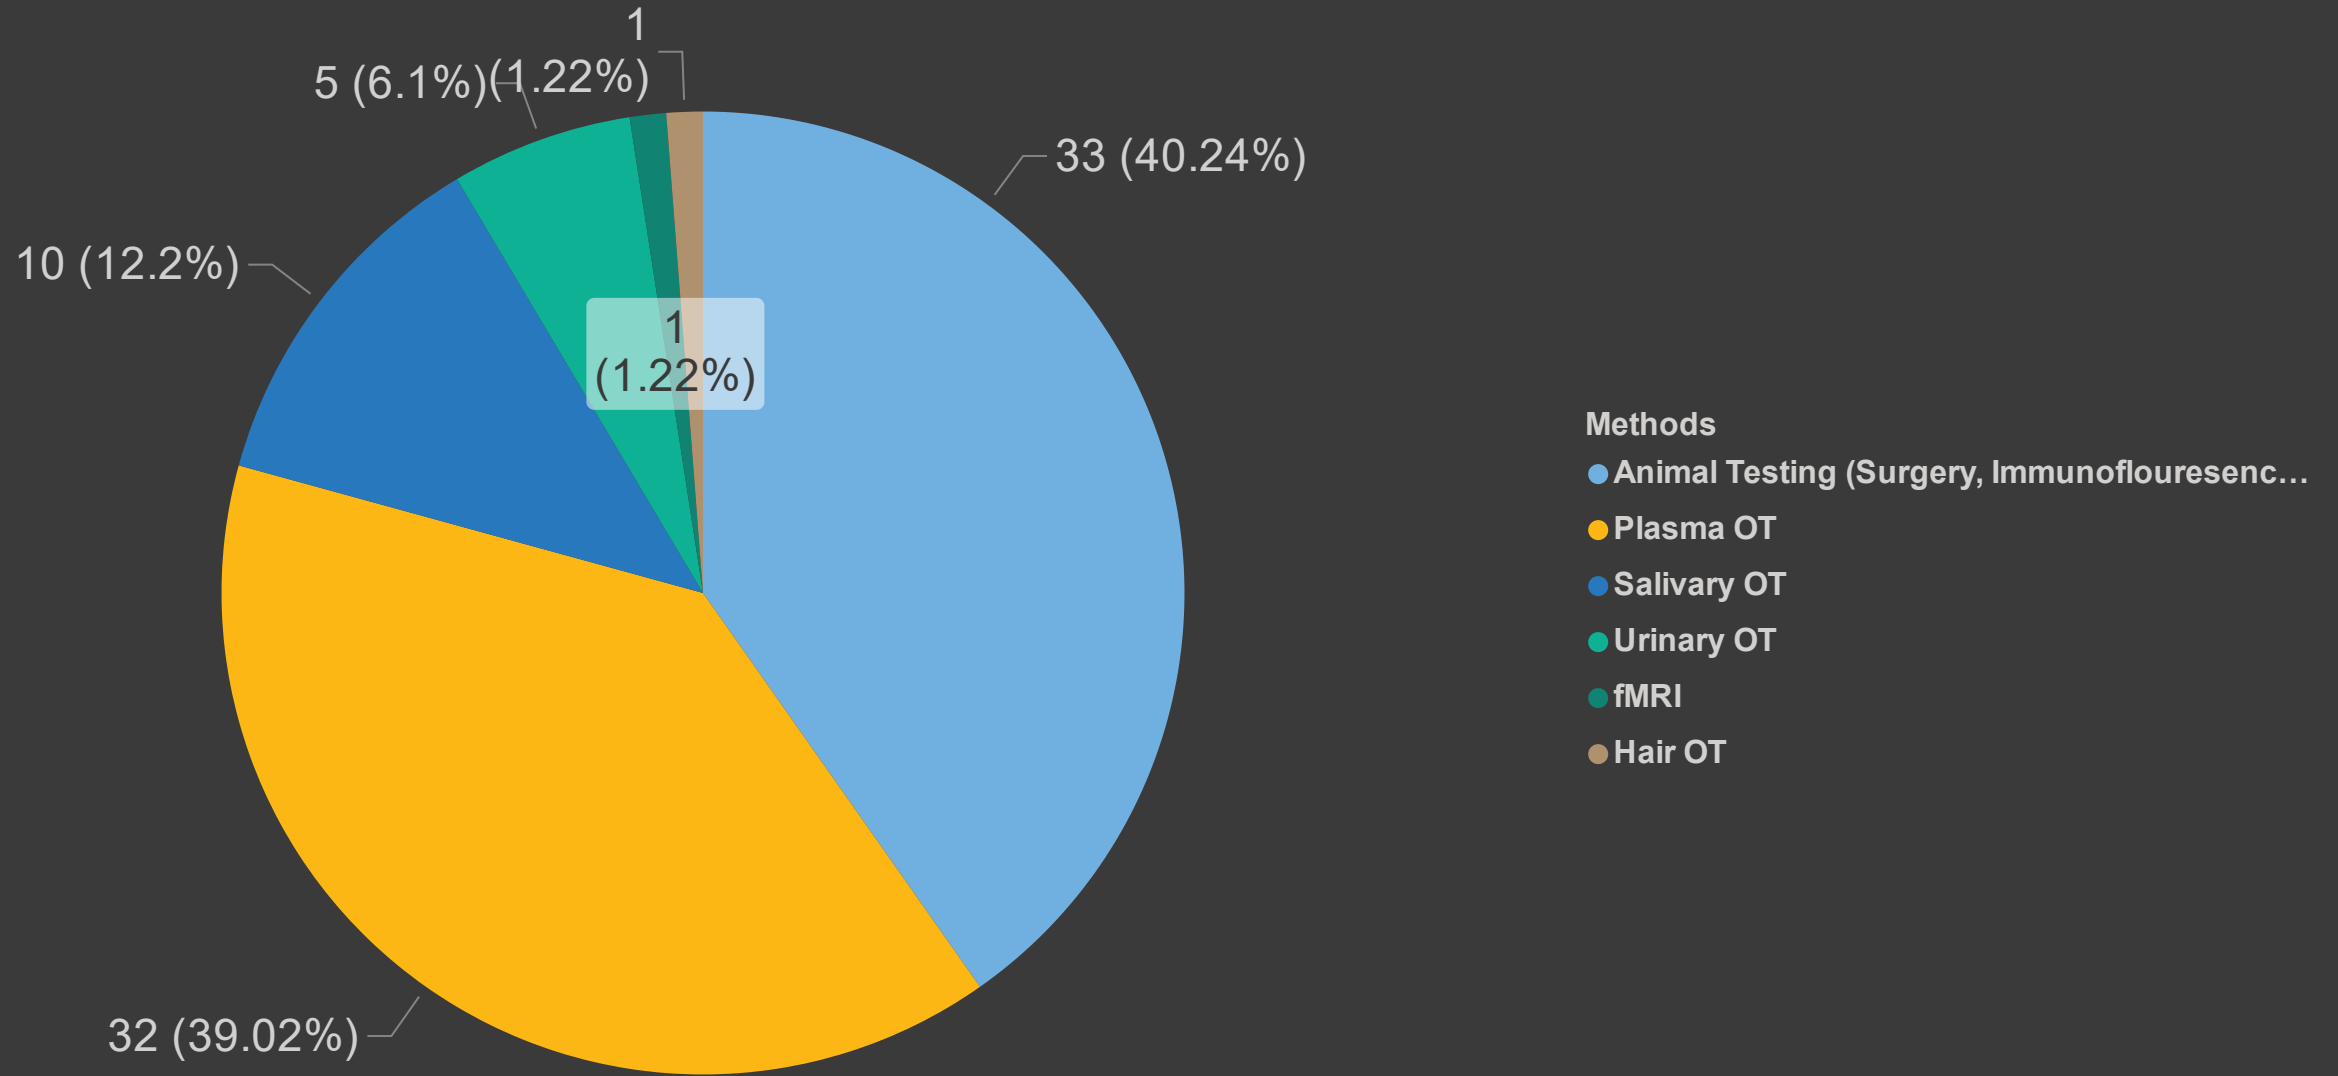

# Mapping of OT outcome

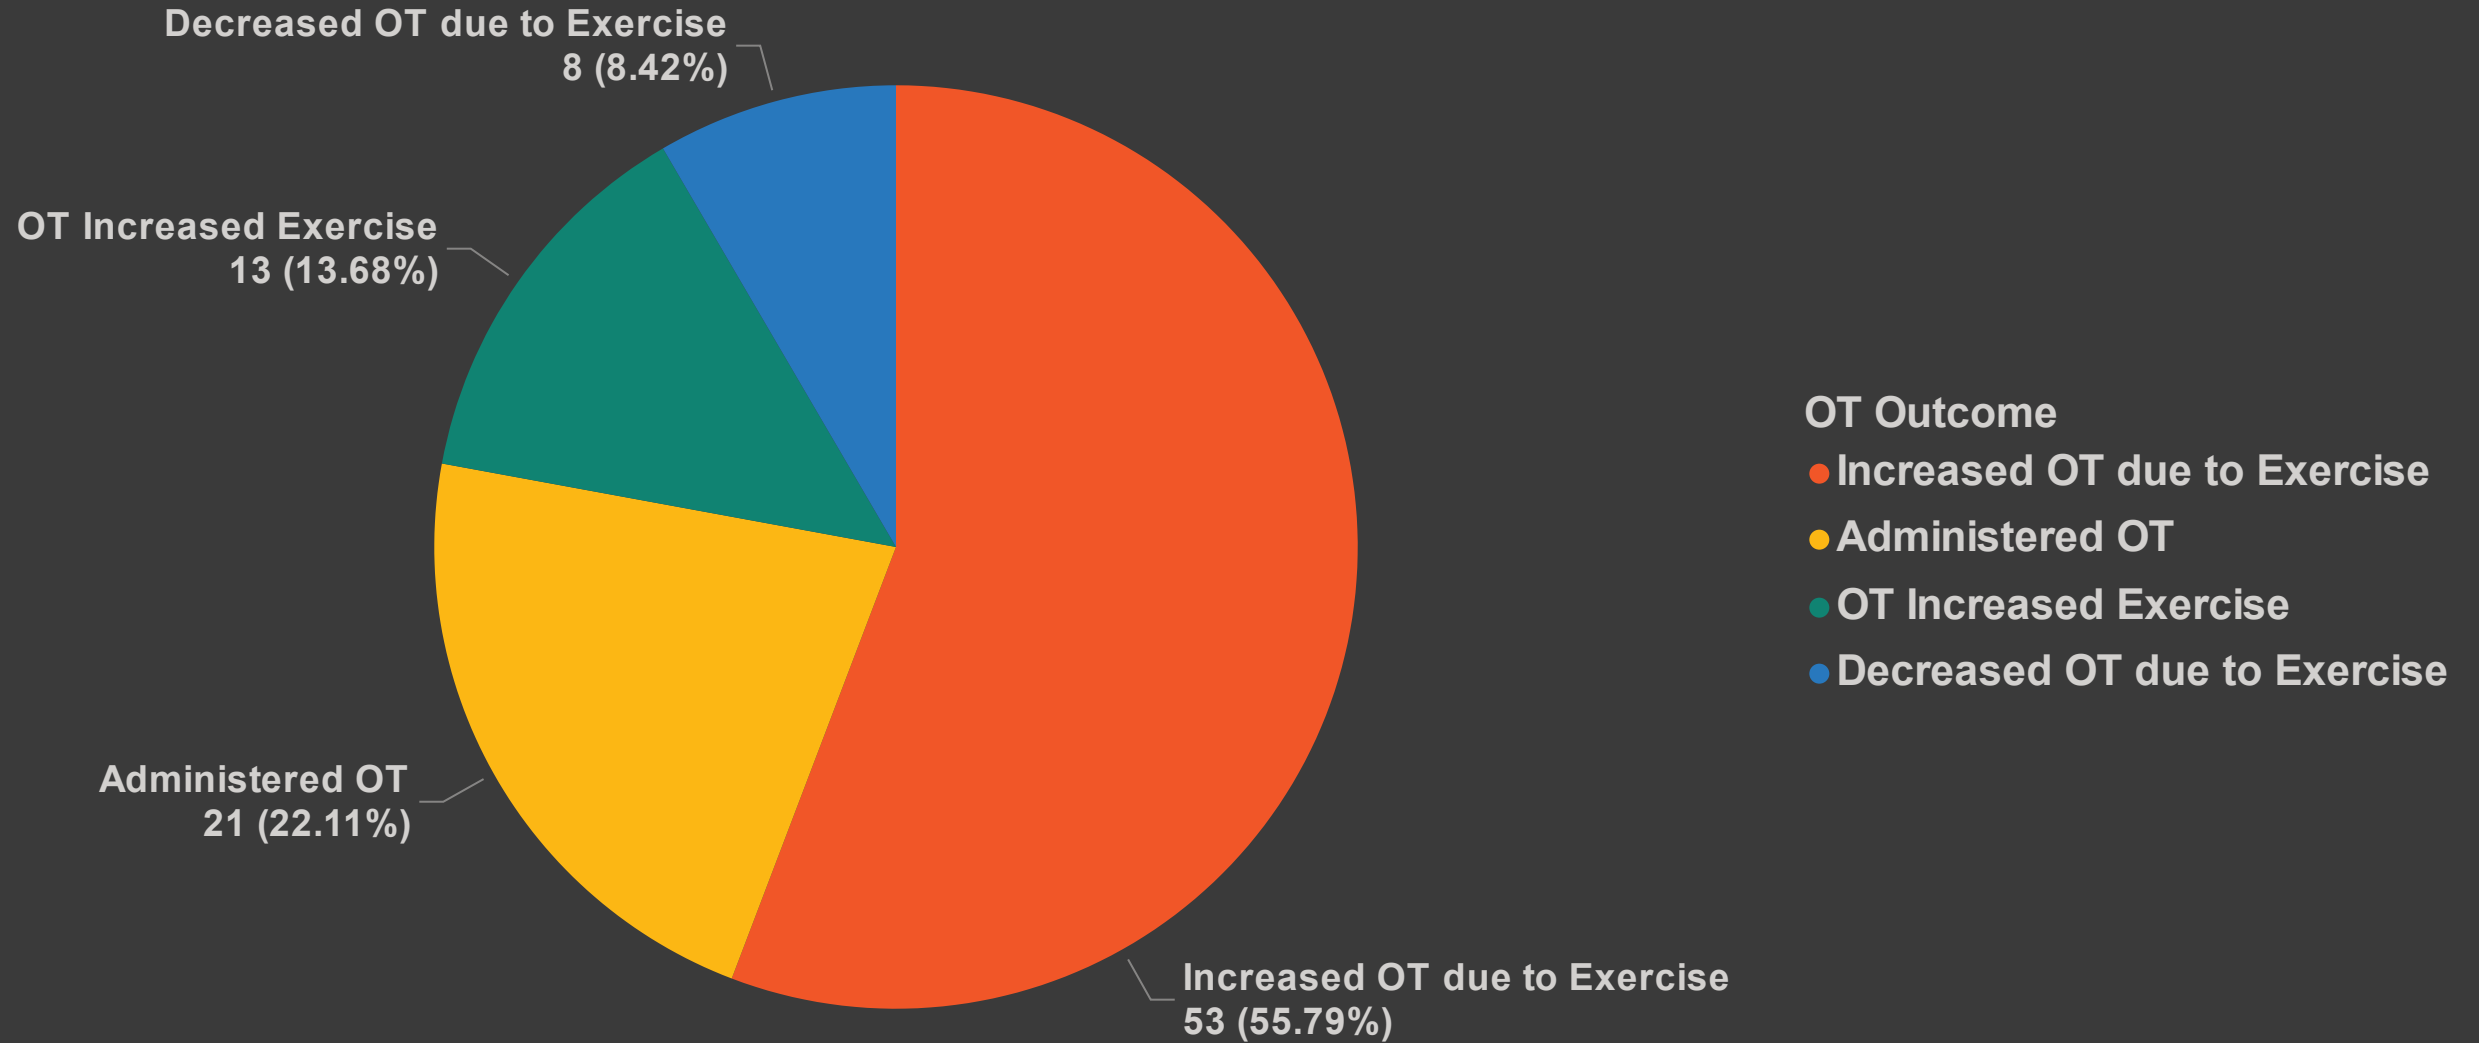

# RoB Assessment

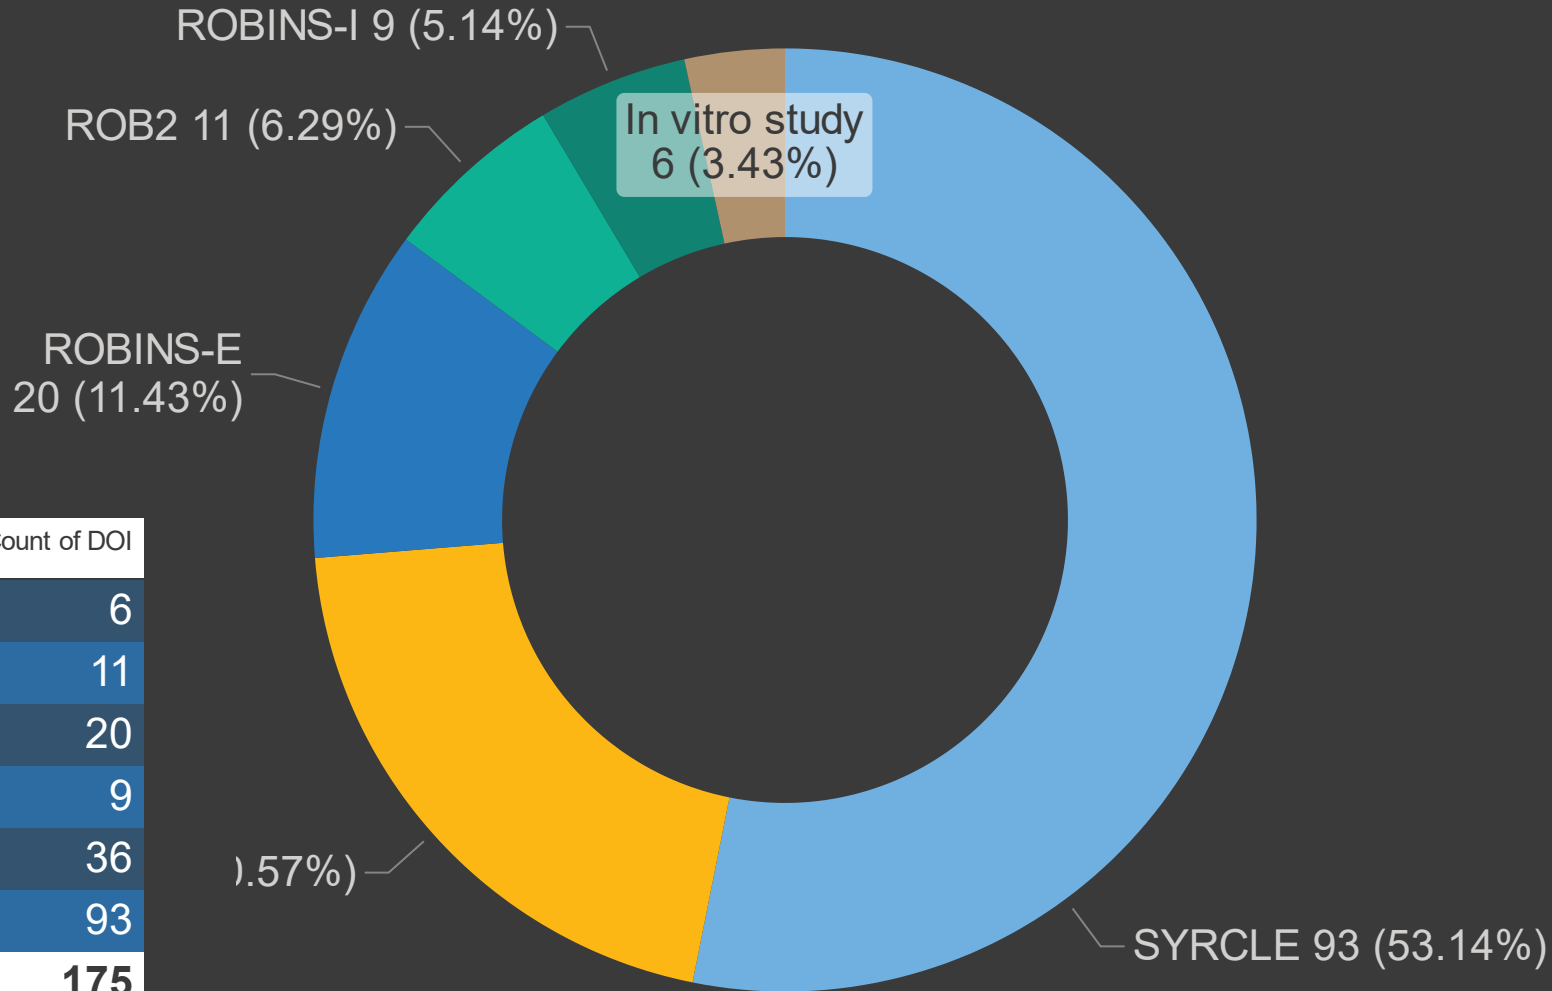

RoB tool (validated)

● SYRCLE

● ROBIS

● ROBINS-E

● ROB2

● ROBINS-I

● In vitro study

# Exercise

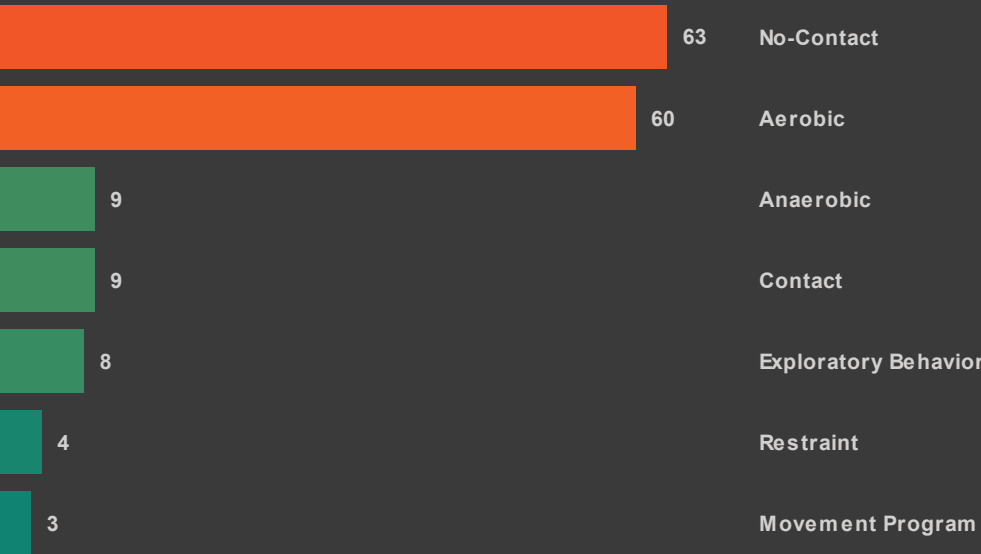

# Count of DOI by Value

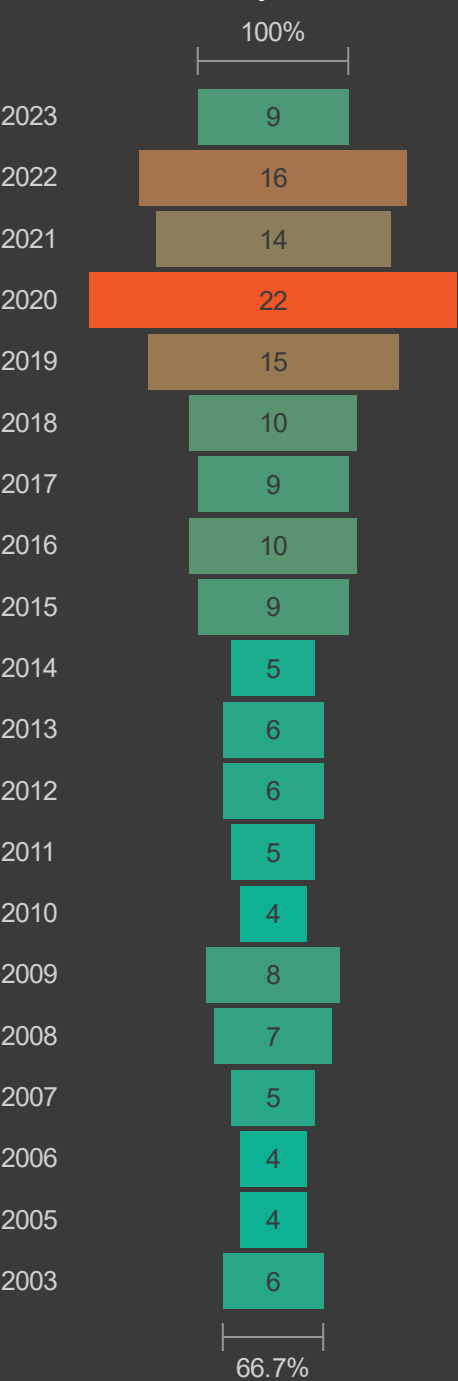

# Factors

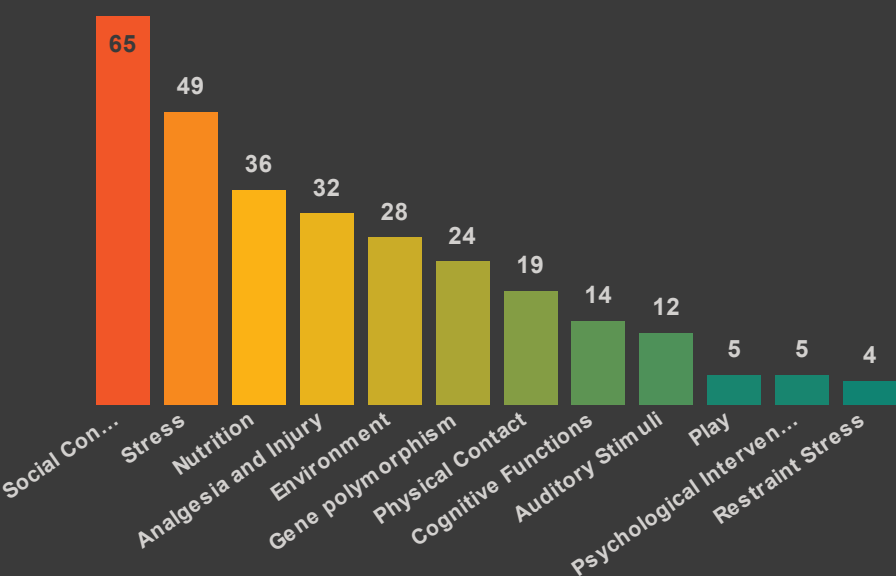

# OT

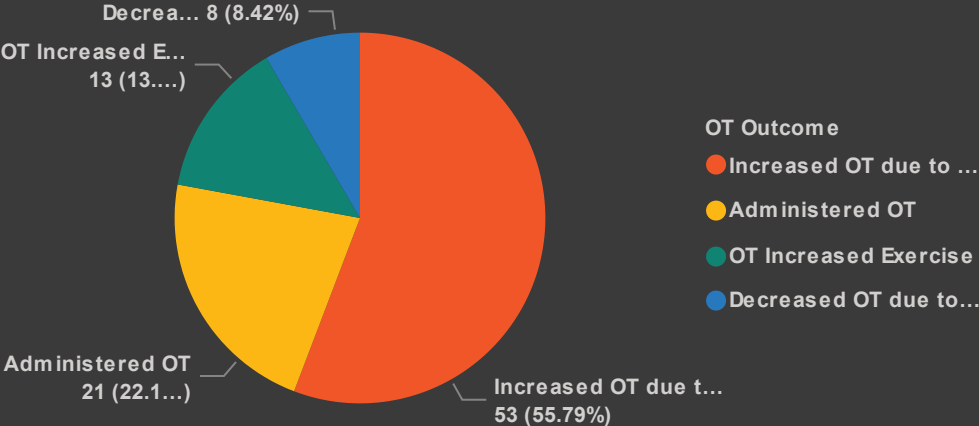

# RoB Assessment

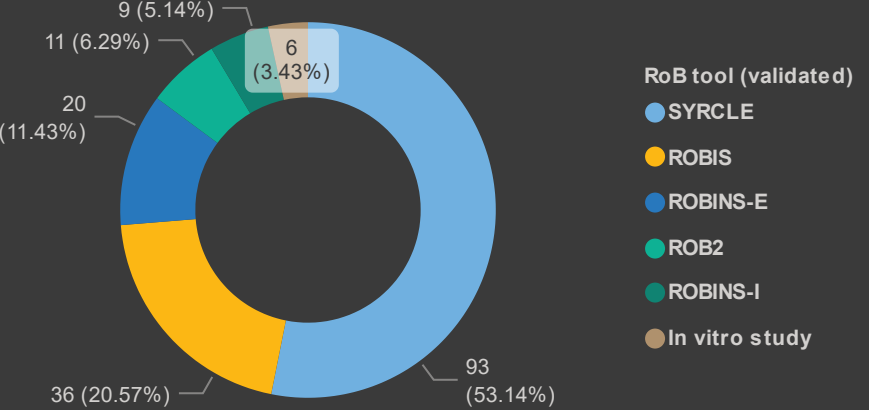

Supplement: Presentation_1.PDF [file Presentation_1.PDF]
